# Supplementary material for: Approaching truly sustainable solar cells by the use of water and cellulose derivatives
Source: Royal Society of Chemistry journal article supplement (doi:10.1039/c6gc02625g), 2016-12-14
Supplement: c6gc02625g1.pdf [file c6gc02625g1.pdf]

## Approaching truly sustainable solar cells by the use of water and cellulose derivatives

Federico **Bella**,<sup>1,\*</sup> Simone **Galliano**,<sup>2</sup> Marisa **Falco**,<sup>1,2</sup> Guido **Viscardi**,<sup>2</sup> Claudia **Barolo**<sup>2,3,\*</sup>, Michael **Grätzel**,<sup>4</sup> Claudio **Gerbaldi**<sup>1</sup>

- 1) *GAME Lab, CHENERGY Group, Department of Applied Science and Technology - DISAT, Politecnico di Torino, Corso Duca degli Abruzzi 24, 10129 – Torino, Italy*
- 2) *Department of Chemistry, NIS Interdepartmental Centre and INSTM Reference Centre, Università degli Studi di Torino, Via Pietro Giuria 7, 10125 - Torino, Italy*
- 3) *ICxT Interdepartmental Centre, Università degli Studi di Torino, Lungo Dora Siena 100, 10153 - Torino, Italy*
- 4) *Laboratory of Photonics and Interfaces, Institut des Sciences et Ingénierie Chimiques, Ecole Polytechnique Fédérale de Lausanne (EPFL), Station 3, CH1015 - Lausanne, Switzerland*

### SUPPORTING INFORMATION

**Table S1 – Ionic conductivity at ambient temperature of gel electrolytes containing NaI 0.50 M and different amount of CMC.**

| CMC (wt%) | Run | Z (Ω) | $\sigma$ (S cm <sup>-1</sup> ) | CMC (wt%) | Run | Z (Ω) | $\sigma$ (S cm <sup>-1</sup> ) |
|-----------|-----|-------|--------------------------------|-----------|-----|-------|--------------------------------|
| 3         | 1   | 0.63  | 1.03×10 <sup>-2</sup>          | 12.5      | 1   | 0.67  | 9.70×10 <sup>-3</sup>          |
|           | 2   | 0.5   | 1.30×10 <sup>-2</sup>          |           | 2   | 0.62  | 1.05×10 <sup>-2</sup>          |
| 5         | 1   | 0.75  | 8.66×10 <sup>-3</sup>          | 15        | 1   | 0.56  | 1.16×10 <sup>-2</sup>          |
|           | 2   | 0.55  | 1.18×10 <sup>-2</sup>          |           | 2   | 0.65  | 9.99×10 <sup>-3</sup>          |
| 7.5       | 1   | 0.55  | 1.18×10 <sup>-2</sup>          | 20        | 1   | 0.6   | 1.08×10 <sup>-2</sup>          |
|           | 2   | 0.64  | 1.02×10 <sup>-2</sup>          |           | 2   | 0.5   | 1.30×10 <sup>-2</sup>          |
| 10        | 1   | 0.58  | 1.12×10 <sup>-2</sup>          | 10*       | 1   | 0.81  | 8.02×10 <sup>-3</sup>          |
|           | 2   | 0.51  | 1.27×10 <sup>-2</sup>          |           |     |       |                                |

\* Blank sample containing CMC 10 wt% in deionized water without NaI.

**Table S2 – Ionic conductivity at different temperatures of gel electrolytes containing NaI 0.50 M and different amounts of CMC.**

| <i>T</i><br>(°C) | CMC 5 wt%       |                                   | CMC 10 wt%      |                                   | CMC 20 wt%      |                                   |
|------------------|-----------------|-----------------------------------|-----------------|-----------------------------------|-----------------|-----------------------------------|
|                  | <i>Z</i><br>(Ω) | <i>σ</i><br>(S cm <sup>-1</sup> ) | <i>Z</i><br>(Ω) | <i>σ</i><br>(S cm <sup>-1</sup> ) | <i>Z</i><br>(Ω) | <i>σ</i><br>(S cm <sup>-1</sup> ) |
| 70               | 0.54            | 1.20×10 <sup>-2</sup>             | 0.49            | 1.33×10 <sup>-2</sup>             | 0.57            | 1.14×10 <sup>-2</sup>             |
| 60               | 0.59            | 1.10×10 <sup>-2</sup>             | 0.56            | 1.16×10 <sup>-2</sup>             | 0.57            | 1.14×10 <sup>-2</sup>             |
| 50               | 0.66            | 9.84×10 <sup>-3</sup>             | 0.59            | 1.10×10 <sup>-2</sup>             | 0.58            | 1.12×10 <sup>-2</sup>             |
| 40               | 0.65            | 9.99×10 <sup>-3</sup>             | 0.59            | 1.10×10 <sup>-2</sup>             | 0.59            | 1.10×10 <sup>-2</sup>             |
| 30               | 0.67            | 9.70×10 <sup>-3</sup>             | 0.59            | 1.10×10 <sup>-2</sup>             | 0.62            | 1.05×10 <sup>-2</sup>             |
| 20               | 0.65            | 9.99×10 <sup>-3</sup>             | 0.62            | 1.05×10 <sup>-2</sup>             | 0.64            | 1.02×10 <sup>-2</sup>             |
| 10               | 0.71            | 9.15×10 <sup>-3</sup>             | 0.68            | 9.55×10 <sup>-3</sup>             | 0.67            | 9.70×10 <sup>-3</sup>             |
| 5                | 0.78            | 8.33×10 <sup>-3</sup>             | 0.73            | 8.90×10 <sup>-3</sup>             | 0.77            | 8.44×10 <sup>-3</sup>             |
| -10              | 0.93            | 6.99×10 <sup>-3</sup>             | 0.88            | 7.38×10 <sup>-3</sup>             | 0.95            | 6.84×10 <sup>-3</sup>             |
| -25              | 12              | 5.41×10 <sup>-4</sup>             | 17.8            | 3.65×10 <sup>-4</sup>             | 1834.9          | 3.54×10 <sup>-6</sup>             |

**Table S3 – Best performances of aqueous DSSCs at different CMC levels corresponding to data points in Fig. 4.**

| CMC<br>(wt%) | Sample |        | Day |    | $V_{oc}$<br>(V) |       | $J_{sc}$<br>(mA cm <sup>-2</sup> ) |      | FF<br>(%) |    | PCE<br>(%) |      |
|--------------|--------|--------|-----|----|-----------------|-------|------------------------------------|------|-----------|----|------------|------|
|              | Na     | K      | Na  | K  | Na              | K     | Na                                 | K    | Na        | K  | Na         | K    |
| 3.5          | Na35B  | K35A   | 6   | 6  | 0.356           | 0.474 | 0.53                               | 2.28 | 51        | 62 | 0.1        | 0.67 |
| 4.5          | Na45A  | K45A   | 6   | 0  | 0.439           | 0.456 | 1.98                               | 2.21 | 60        | 63 | 0.52       | 0.63 |
| 5.5          | Na55A  | K55B   | 0   | 0  | 0.437           | 0.453 | 2.33                               | 2.61 | 60        | 61 | 0.61       | 0.72 |
| 6.5          |        | K65A   |     | 1  |                 | 0.467 |                                    | 2.33 |           | 61 |            | 0.66 |
| 7.5          | Na75A  | K75B   | 6   | 0  | 0.433           | 0.448 | 1.76                               | 2.15 | 59        | 61 | 0.45       | 0.59 |
|              |        |        |     |    |                 |       |                                    |      |           |    |            |      |
| 0            | B2*    | K55A** | 2   | 12 | 0.543           | 0.488 | 2.10                               | 2.70 | 60        | 62 | 0.68       | 0.81 |
| 0            | B1*    | K55B** | 2   | 12 | 0.536           | 0.450 | 1.20                               | 2.78 | 58        | 59 | 0.37       | 0.74 |

\* Liquid NaI 4.5 M + I<sub>2</sub> 50 mM

\*\* Liquid KI 5.5 M + I<sub>2</sub> 50 mM

**Table S4 – Evolution of photovoltaic parameters of aqueous DSSCs sensitized with D131:CDCA = 1:1.18 and filled with NaI 4.50 M, I<sub>2</sub> 50 mM and CMC 3.5 wt% (cell Na35A) or KI 5.50 M, I<sub>2</sub> 50 mM and CMC 3.5 wt% (cell K35B) stored at RT under dark condition.**

| Na35A    |     |                      |                                        |        |         | K35B     |     |                      |                                        |        |         |
|----------|-----|----------------------|----------------------------------------|--------|---------|----------|-----|----------------------|----------------------------------------|--------|---------|
| Time (d) | Run | V <sub>oc</sub> (mV) | J <sub>sc</sub> (mA cm <sup>-2</sup> ) | FF (%) | PCE (%) | Time (d) | Run | V <sub>oc</sub> (mV) | J <sub>sc</sub> (mA cm <sup>-2</sup> ) | FF (%) | PCE (%) |
| 0        | 1   | 363                  | 0.45                                   | 51     | 0.08    | 0        | 1   | 314                  | 0.32                                   | 42     | 0.04    |
|          | 2   | 356                  | 0.44                                   | 50     | 0.08    |          | 2   | 313                  | 0.30                                   | 44     | 0.04    |
|          | 3   | 353                  | 0.45                                   | 50     | 0.08    |          | 3   | 313                  | 0.30                                   | 44     | 0.04    |
| 6        | 1   | 364                  | 0.59                                   | 48     | 0.10    | 6        | 1   | 358                  | 0.52                                   | 46     | 0.09    |
|          | 2   | 345                  | 0.59                                   | 44     | 0.09    |          | 2   | 356                  | 0.56                                   | 47     | 0.09    |
|          | 3   | 337                  | 0.58                                   | 41     | 0.08    |          | 3   | 357                  | 0.57                                   | 48     | 0.10    |
| 13       | 1   | 394                  | 0.73                                   | 56     | 0.16    | 13       | 1   | 376                  | 0.80                                   | 47     | 0.14    |
|          | 2   | 385                  | 0.74                                   | 56     | 0.16    |          | 2   | 369                  | 0.81                                   | 47     | 0.14    |
|          | 3   | 382                  | 0.75                                   | 56     | 0.16    |          | 3   | 370                  | 0.82                                   | 48     | 0.14    |
| 20       | 1   | 390                  | 0.76                                   | 56     | 0.17    | 20       | 1   | 390                  | 1.04                                   | 49     | 0.20    |
|          | 2   | 386                  | 0.77                                   | 56     | 0.17    |          | 2   | 391                  | 1.05                                   | 50     | 0.20    |
|          | 3   | 382                  | 0.78                                   | 56     | 0.17    |          | 3   | 391                  | 1.05                                   | 50     | 0.21    |
| 29       | 1   | 388                  | 0.80                                   | 57     | 0.18    | 28       | 1   | 428                  | 1.30                                   | 60     | 0.33    |
|          | 2   | 383                  | 0.81                                   | 57     | 0.18    |          | 2   | 432                  | 1.29                                   | 60     | 0.33    |
|          | 3   | 376                  | 0.82                                   | 56     | 0.17    |          | 3   | 432                  | 1.27                                   | 59     | 0.32    |

**Table S5 – Evolution of photovoltaic parameters of aqueous DSSCs sensitized with D131:CDCA = 1:1.18 and filled with NaI 4.50 M, I<sub>2</sub> 50 mM and CMC 3.5 wt% (cell Na35B) or KI 5.50 M, I<sub>2</sub> 50 mM and CMC 3.5 wt% (cell K35A) stored at 60 °C under dark conditions after 6 days of storage at RT.**

| Na35B    |     |                      |                                        |        |         |                 | K35A     |     |                      |                                        |        |         |                 |
|----------|-----|----------------------|----------------------------------------|--------|---------|-----------------|----------|-----|----------------------|----------------------------------------|--------|---------|-----------------|
| Time (d) | Run | V <sub>oc</sub> (mV) | J <sub>sc</sub> (mA cm <sup>-2</sup> ) | FF (%) | PCE (%) | Time @60 °C (d) | Time (d) | Run | V <sub>oc</sub> (mV) | J <sub>sc</sub> (mA cm <sup>-2</sup> ) | FF (%) | PCE (%) | Time @60 °C (d) |
| 0        | 1   | 348                  | 0.40                                   | 49     | 0.07    | 0               | 0        | 1   | 429                  | 1.19                                   | 62     | 0.32    | 0               |
|          | 2   | 341                  | 0.40                                   | 48     | 0.07    |                 |          | 2   | 426                  | 1.18                                   | 62     | 0.31    |                 |
|          | 3   | 340                  | 0.41                                   | 48     | 0.07    |                 |          | 3   | 423                  | 1.19                                   | 62     | 0.31    |                 |
| 6        | 1   | 369                  | 0.53                                   | 51     | 0.10    | 0               | 1        | 1   | 440                  | 1.14                                   | 63     | 0.32    | 0               |
|          | 2   | 360                  | 0.53                                   | 51     | 0.10    |                 |          | 2   | 436                  | 1.13                                   | 63     | 0.31    |                 |
|          | 3   | 356                  | 0.53                                   | 51     | 0.10    |                 |          | 3   | 432                  | 1.12                                   | 63     | 0.30    |                 |
| 7        | 1*  | 305                  | 1.11                                   | 43     | 0.15    | 1               | 6        | 1   | 481                  | 2.28                                   | 62     | 0.68    | 0               |
|          | 2*  | 324                  | 1.12                                   | 44     | 0.16    |                 |          | 2   |                      |                                        |        |         |                 |
|          | 3*  | 333                  | 1.13                                   | 44     | 0.17    |                 |          | 3   | 474                  | 2.28                                   | 62     | 0.67    |                 |
| 8        | 1   | 393                  | 1.12                                   | 47     | 0.21    | 1               | 7        | 1*  | 383                  | 1.57                                   | 57     | 0.34    | 1               |
|          | 2   | 389                  | 1.13                                   | 47     | 0.21    |                 |          | 2*  | 401                  | 1.64                                   | 59     | 0.39    |                 |
|          | 3   | 386                  | 1.13                                   | 46     | 0.20    |                 |          | 3*  | 409                  | 1.68                                   | 59     | 0.41    |                 |
| 13       | 1*  | 263                  | 0.35                                   | 46     | 0.04    | 6               | 8        | 1   | 475                  | 1.90                                   | 63     | 0.57    | 1               |
|          | 2*  | 282                  | 0.36                                   | 48     | 0.05    |                 |          | 2   | 472                  | 1.89                                   | 63     | 0.56    |                 |
|          | 3*  | 289                  | 0.37                                   | 49     | 0.05    |                 |          | 3   | 468                  | 1.89                                   | 63     | 0.55    |                 |
| 14       | 1   | 399                  | 1.35                                   | 51     | 0.27    | 6               | 13       | 1*  | 379                  | 1.28                                   | 57     | 0.28    | 6               |
|          | 2   | 396                  | 1.36                                   | 51     | 0.27    |                 |          | 2*  | 397                  | 1.33                                   | 59     | 0.31    |                 |
|          | 3   | 391                  | 1.37                                   | 51     | 0.27    |                 |          | 3*  | 404                  | 1.35                                   | 59     | 0.32    |                 |
| 20       | 1*  | 264                  | 0.29                                   | 46     | 0.04    | 12              | 14       | 1   | 470                  | 1.54                                   | 63     | 0.45    | 6               |
|          | 2*  | 280                  | 0.30                                   | 48     | 0.04    |                 |          | 2   | 464                  | 1.53                                   | 63     | 0.44    |                 |
|          | 3*  | 287                  | 0.30                                   | 48     | 0.04    |                 |          | 3   | 461                  | 1.51                                   | 62     | 0.43    |                 |
| 21       | 1   | 389                  | 1.19                                   | 50     | 0.23    | 12              | 20       | 1*  | 366                  | 1.03                                   | 56     | 0.21    | 12              |
|          | 2   | 387                  | 1.19                                   | 50     | 0.23    |                 |          | 2*  | 387                  | 1.07                                   | 57     | 0.24    |                 |
|          | 3   | 384                  | 1.19                                   | 50     | 0.23    |                 |          | 3*  | 395                  | 1.08                                   | 58     | 0.25    |                 |

|           |          |     |      |    |      |           |           |           |      |      |      |      |           |
|-----------|----------|-----|------|----|------|-----------|-----------|-----------|------|------|------|------|-----------|
| <b>29</b> | <b>1</b> | 377 | 1.02 | 46 | 0.18 | <b>20</b> | <b>21</b> | <b>1</b>  | 453  | 1.22 | 61   | 0.33 | <b>12</b> |
|           | <b>2</b> | 375 | 1.01 | 46 | 0.17 |           |           | <b>2</b>  | 449  | 1.18 | 61   | 0.32 |           |
|           | <b>3</b> | 373 | 1.01 | 46 | 0.17 |           |           | <b>3</b>  | 446  | 1.16 | 61   | 0.31 |           |
|           |          |     |      |    |      |           | <b>28</b> | <b>1*</b> | 371  | 0.90 | 54   | 0.18 | <b>19</b> |
|           |          |     |      |    |      |           | <b>2*</b> | 386       | 0.91 | 55   | 0.19 |      |           |
|           |          |     |      |    |      |           | <b>3*</b> | 392       | 0.91 | 55   | 0.20 |      |           |
|           |          |     |      |    |      |           | <b>29</b> | <b>1</b>  | 499  | 1.79 | 62   | 0.55 | <b>19</b> |
|           |          |     |      |    |      |           | <b>2</b>  | 495       | 1.77 | 61   | 0.54 |      |           |
|           |          |     |      |    |      |           | <b>3</b>  | 491       | 1.74 | 61   | 0.52 |      |           |
|           |          |     |      |    |      |           | <b>36</b> | <b>1</b>  | 445  | 1.04 | 59   | 0.27 | <b>19</b> |
|           |          |     |      |    |      |           | <b>2</b>  | 440       | 1.01 | 59   | 0.26 |      |           |
|           |          |     |      |    |      |           | <b>3</b>  | 438       | 0.99 | 59   | 0.25 |      |           |

\* measured at ~60 °C

**Table S6 – Evolution of photovoltaic parameters of aqueous DSSCs sensitized with D131:CDCA = 1:1.18 and filled with NaI 4.50 M, I<sub>2</sub> 50 mM and CMC 4.5 wt% (cell Na45A) or KI 5.50 M, I<sub>2</sub> 50 mM and CMC 4.5 wt% (cell K45B) stored at RT under dark conditions.**

| Na45A    |     |               |                                 |        |         | K45B     |     |               |                                 |        |         |
|----------|-----|---------------|---------------------------------|--------|---------|----------|-----|---------------|---------------------------------|--------|---------|
| Time (d) | Run | $V_{oc}$ (mV) | $J_{sc}$ (mA cm <sup>-2</sup> ) | FF (%) | PCE (%) | Time (d) | Run | $V_{oc}$ (mV) | $J_{sc}$ (mA cm <sup>-2</sup> ) | FF (%) | PCE (%) |
| 0        | 1   | 427           | 1.38                            | 56     | 0.33    | 0        | 1   | 326           | 0.32                            | 43     | 0.04    |
|          | 2   | 421           | 1.40                            | 56     | 0.33    |          | 2   | 328           | 0.33                            | 44     | 0.05    |
|          | 3   | 418           | 1.42                            | 55     | 0.33    |          | 3   | 333           | 0.35                            | 46     | 0.05    |
| 6        | 1   | 443           | 1.92                            | 59     | 0.51    | 6        | 1   | 394           | 0.72                            | 49     | 0.14    |
|          | 2   | 442           | 1.96                            | 60     | 0.52    |          | 2   | 389           | 0.77                            | 50     | 0.15    |
|          | 3   | 439           | 1.98                            | 60     | 0.52    |          | 3   | 387           | 0.79                            | 50     | 0.15    |
| 13       | 1   | 440           | 1.84                            | 59     | 0.48    | 13       | 1   | 406           | 1.09                            | 51     | 0.23    |
|          | 2   | 438           | 1.91                            | 60     | 0.50    |          | 2   | 405           | 1.09                            | 52     | 0.23    |
|          | 3   | 434           | 1.92                            | 60     | 0.50    |          | 3   | 401           | 1.07                            | 52     | 0.23    |
| 20       | 1   | 441           | 1.88                            | 60     | 0.49    | 20       | 1   | 429           | 1.33                            | 58     | 0.33    |
|          | 2   | 439           | 1.91                            | 61     | 0.51    |          | 2   | 428           | 1.33                            | 59     | 0.34    |
|          | 3   | 435           | 1.93                            | 61     | 0.51    |          | 3   | 425           | 1.33                            | 59     | 0.33    |
| 29       | 1   | 436           | 1.89                            | 60     | 0.49    | 28       | 1   | 408           | 1.17                            | 51     | 0.25    |
|          | 2   | 433           | 1.93                            | 61     | 0.51    |          | 2   | 405           | 1.18                            | 52     | 0.25    |
|          | 3   | 431           | 1.94                            | 61     | 0.51    |          | 3   | 405           | 1.19                            | 52     | 0.25    |

**Table S7 – Evolution of photovoltaic parameters of aqueous DSSCs sensitized with D131:CDCA = 1:1.18 and filled with NaI 4.50 M, I<sub>2</sub> 50 mM and CMC 4.5 wt% (cell Na45B) or KI 5.50 M, I<sub>2</sub> 50 mM and CMC 4.5 wt% (cell K45A) stored at 60 °C under dark conditions after 6 days of storage at RT.**

| Na45B    |     |                      |                                        |        |         |                 | K45A     |     |                      |                                        |        |         |                 |
|----------|-----|----------------------|----------------------------------------|--------|---------|-----------------|----------|-----|----------------------|----------------------------------------|--------|---------|-----------------|
| Time (d) | Run | V <sub>oc</sub> (mV) | J <sub>sc</sub> (mA cm <sup>-2</sup> ) | FF (%) | PCE (%) | Time @60 °C (d) | Time (d) | Run | V <sub>oc</sub> (mV) | J <sub>sc</sub> (mA cm <sup>-2</sup> ) | FF (%) | PCE (%) | Time @60 °C (d) |
| 0        | 1   | 409                  | 1.28                                   | 57     | 0.30    | 0               | 0        | 1   | 465                  | 2.23                                   | 63     | 0.65    | 0               |
|          | 2   | 404                  | 1.30                                   | 56     | 0.29    |                 |          | 2   | 460                  | 2.22                                   | 63     | 0.64    |                 |
|          | 3   | 400                  | 1.30                                   | 55     | 0.29    |                 |          | 3   | 456                  | 2.21                                   | 63     | 0.63    |                 |
| 6        | 1   | 421                  | 1.68                                   | 60     | 0.42    | 0               | 1        | 1   | 443                  | 1.13                                   | 63     | 0.32    | 0               |
|          | 2   | 419                  | 1.71                                   | 60     | 0.43    |                 |          | 2   | 439                  | 1.13                                   | 63     | 0.31    |                 |
|          | 3   | 416                  | 1.72                                   | 60     | 0.43    |                 |          | 3   | 437                  | 1.13                                   | 63     | 0.31    |                 |
| 7        | 1*  | 353                  | 2.22                                   | 58     | 0.45    | 1               | 6        | 1   | 475                  | 1.97                                   | 63     | 0.59    | 0               |
|          | 2*  | 369                  | 2.29                                   | 59     | 0.50    |                 |          | 2   | 469                  | 1.97                                   | 63     | 0.58    |                 |
|          | 3*  | 379                  | 2.34                                   | 60     | 0.53    |                 |          | 3   | 390                  | 1.26                                   | 58     | 0.29    |                 |
| 8        | 1   | 435                  | 2.48                                   | 62     | 0.67    | 1               | 7        | 1*  | 405                  | 1.32                                   | 60     | 0.32    | 1               |
|          | 2   | 431                  | 2.48                                   | 62     | 0.66    |                 |          | 2*  | 412                  | 1.35                                   | 61     | 0.34    |                 |
|          | 3   | 428                  | 2.47                                   | 62     | 0.65    |                 |          | 3*  | 473                  | 1.52                                   | 63     | 0.46    |                 |
| 13       | 1*  | 362                  | 1.63                                   | 57     | 0.33    | 6               | 8        | 1   | 470                  | 1.51                                   | 64     | 0.45    | 1               |
|          | 2*  | 371                  | 1.67                                   | 57     | 0.35    |                 |          | 2   | 465                  | 1.51                                   | 63     | 0.44    |                 |
|          | 3*  | 376                  | 1.69                                   | 58     | 0.37    |                 |          | 3   | 386                  | 1.06                                   | 58     | 0.24    |                 |
| 14       | 1   | 426                  | 1.74                                   | 60     | 0.45    | 6               | 13       | 1*  | 399                  | 1.09                                   | 59     | 0.26    | 6               |
|          | 2   | 421                  | 1.74                                   | 60     | 0.44    |                 |          | 2*  | 407                  | 1.11                                   | 60     | 0.27    |                 |
|          | 3   | 417                  | 1.73                                   | 60     | 0.43    |                 |          | 3*  | 472                  | 1.25                                   | 64     | 0.38    |                 |
| 20       | 1*  | 355                  | 1.32                                   | 55     | 0.26    | 12              | 14       | 1   | 469                  | 1.23                                   | 63     | 0.37    | 6               |
|          | 2*  | 362                  | 1.34                                   | 56     | 0.27    |                 |          | 2   | 465                  | 1.23                                   | 63     | 0.36    |                 |
|          | 3*  | 367                  | 1.35                                   | 56     | 0.28    |                 |          | 3   | 381                  | 0.88                                   | 57     | 0.19    |                 |
| 21       | 1   | 421                  | 1.45                                   | 58     | 0.36    | 12              | 20       | 1*  | 395                  | 0.89                                   | 58     | 0.20    | 12              |
|          | 2   | 415                  | 1.43                                   | 58     | 0.34    |                 |          | 2*  | 401                  | 0.90                                   | 58     | 0.21    |                 |
|          | 3   | 410                  | 1.41                                   | 58     | 0.34    |                 |          | 3*  | 459                  | 1.02                                   | 62     | 0.29    |                 |



|           |          |     |      |    |      |           |           |           |      |      |      |      |           |
|-----------|----------|-----|------|----|------|-----------|-----------|-----------|------|------|------|------|-----------|
| <b>29</b> | <b>1</b> | 409 | 1.21 | 56 | 0.28 | <b>20</b> | <b>21</b> | <b>1</b>  | 455  | 0.99 | 62   | 0.28 | <b>12</b> |
|           | <b>2</b> | 404 | 1.19 | 55 | 0.27 |           |           | <b>2</b>  | 451  | 0.97 | 62   | 0.27 |           |
|           | <b>3</b> | 400 | 1.18 | 55 | 0.26 |           |           | <b>3</b>  | 384  | 0.80 | 57   | 0.17 |           |
|           |          |     |      |    |      |           | <b>28</b> | <b>1*</b> | 397  | 0.81 | 57   | 0.18 | <b>19</b> |
|           |          |     |      |    |      |           | <b>2*</b> | 403       | 0.81 | 58   | 0.19 |      |           |
|           |          |     |      |    |      |           | <b>3*</b> | 451       | 0.90 | 60   | 0.24 |      |           |
|           |          |     |      |    |      |           | <b>29</b> | <b>1</b>  | 450  | 0.88 | 60   | 0.24 | <b>19</b> |
|           |          |     |      |    |      |           | <b>2</b>  | 447       | 0.87 | 60   | 0.23 |      |           |
|           |          |     |      |    |      |           | <b>3</b>  | 451       | 0.88 | 60   | 0.24 |      |           |
|           |          |     |      |    |      |           | <b>36</b> | <b>1</b>  | 449  | 0.86 | 60   | 0.23 | <b>19</b> |
|           |          |     |      |    |      |           | <b>2</b>  | 446       | 0.85 | 60   | 0.23 |      |           |
|           |          |     |      |    |      |           | <b>3</b>  | 469       | 1.23 | 63   | 0.37 |      |           |

\* measured at ~60 °C

**Table S8 – Evolution of photovoltaic parameters of aqueous DSSCs sensitized with D131:CDCA = 1:1.18 and filled with NaI 4.50 M, I<sub>2</sub> 50 mM and CMC 5.5 wt% (cell Na55A) or KI 5.50 M, I<sub>2</sub> 50 mM and CMC 5.5 wt% (cell K45B) stored at RT under dark conditions.**

| Na55A    |     |                      |                                        |        |         | K45B     |     |                      |                                        |        |         |
|----------|-----|----------------------|----------------------------------------|--------|---------|----------|-----|----------------------|----------------------------------------|--------|---------|
| Time (d) | Run | V <sub>oc</sub> (mV) | J <sub>sc</sub> (mA cm <sup>-2</sup> ) | FF (%) | PCE (%) | Time (d) | Run | V <sub>oc</sub> (mV) | J <sub>sc</sub> (mA cm <sup>-2</sup> ) | FF (%) | PCE (%) |
| 0        | 1   | 443                  | 2.30                                   | 59     | 0.60    | 0        | 1   | 461                  | 2.60                                   | 60     | 0.73    |
|          | 2   | 440                  | 2.32                                   | 60     | 0.61    |          | 2   | 458                  | 2.61                                   | 61     | 0.72    |
|          | 3   | 437                  | 2.33                                   | 60     | 0.61    |          | 3   | 453                  | 2.61                                   | 61     | 0.72    |
| 6        | 1   | 442                  | 2.17                                   | 60     | 0.58    | 1        | 1   | 458                  | 2.31                                   | 60     | 0.63    |
|          | 2   | 441                  | 2.19                                   | 61     | 0.59    |          | 2   | 456                  | 2.32                                   | 61     | 0.64    |
|          | 3   | 438                  | 2.20                                   | 61     | 0.59    |          | 3   | 453                  | 2.34                                   | 61     | 0.64    |
| 13       | 1   | 430                  | 1.58                                   | 59     | 0.40    | 6        | 1   | 449                  | 1.87                                   | 59     | 0.50    |
|          | 2   | 427                  | 1.61                                   | 59     | 0.41    |          | 2   | 448                  | 1.90                                   | 60     | 0.51    |
|          | 3   | 424                  | 1.63                                   | 59     | 0.41    |          | 3   | 446                  | 1.91                                   | 61     | 0.52    |
| 20       | 1   | 438                  | 2.04                                   | 61     | 0.54    | 13       | 1   | 438                  | 1.64                                   | 59     | 0.42    |
|          | 2   | 436                  | 2.06                                   | 61     | 0.55    |          | 2   | 438                  | 1.68                                   | 60     | 0.44    |
|          | 3   | 432                  | 2.08                                   | 61     | 0.55    |          | 3   | 436                  | 1.70                                   | 60     | 0.45    |
| 29       | 1   | 441                  | 2.13                                   | 61     | 0.58    | 20       | 1   | 430                  | 1.48                                   | 58     | 0.37    |
|          | 2   | 435                  | 2.14                                   | 61     | 0.57    |          | 2   | 429                  | 1.50                                   | 59     | 0.38    |
|          | 3   | 431                  | 2.14                                   | 62     | 0.57    |          | 3   | 427                  | 1.52                                   | 60     | 0.39    |
|          |     |                      |                                        |        |         | 28       | 1   | 431                  | 1.39                                   | 58     | 0.35    |
|          |     |                      |                                        |        |         |          | 2   | 431                  | 1.42                                   | 59     | 0.36    |
|          |     |                      |                                        |        |         |          | 3   | 428                  | 1.44                                   | 60     | 0.37    |
|          |     |                      |                                        |        |         | 36       | 1   | 428                  | 1.36                                   | 58     | 0.34    |
|          |     |                      |                                        |        |         |          | 2   | 429                  | 1.39                                   | 59     | 0.35    |
|          |     |                      |                                        |        |         |          | 3   | 427                  | 1.40                                   | 60     | 0.36    |

**Table S9 – Evolution of photovoltaic parameters of aqueous DSSCs sensitized with D131:CDCA = 1:1.18 and filled with NaI 4.50 M, I<sub>2</sub> 50 mM and CMC 5.5 wt% (cell Na55B) or KI 5.50 M, I<sub>2</sub> 50 mM and CMC 5.5 wt% (cell K55A) stored at 60 °C under dark condition after 6 days of storage at ambient temperature.**

| Na55B    |     |                      |                                        |        |         |                 | K55A     |     |                      |                                        |        |         |                 |
|----------|-----|----------------------|----------------------------------------|--------|---------|-----------------|----------|-----|----------------------|----------------------------------------|--------|---------|-----------------|
| Time (d) | Run | V <sub>oc</sub> (mV) | J <sub>sc</sub> (mA cm <sup>-2</sup> ) | FF (%) | PCE (%) | Time @60 °C (d) | Time (d) | Run | V <sub>oc</sub> (mV) | J <sub>sc</sub> (mA cm <sup>-2</sup> ) | FF (%) | PCE (%) | Time @60 °C (d) |
| 0        | 1   | 445                  | 2.10                                   | 58     | 0.56    | 0               | 0        | 1   | 452                  | 2.13                                   | 57     | 0.55    | 0               |
|          | 2   | 442                  | 2.12                                   | 59     | 0.55    |                 |          | 2   | 449                  | 2.13                                   | 57     | 0.55    |                 |
|          | 3   | 438                  | 2.14                                   | 59     | 0.55    |                 |          | 3   | 445                  | 2.12                                   | 57     | 0.54    |                 |
| 6        | 1   | 439                  | 1.90                                   | 59     | 0.49    | 0               | 1        | 1   | 448                  | 2.12                                   | 57     | 0.54    | 0               |
|          | 2   | 437                  | 1.92                                   | 60     | 0.50    |                 |          | 2   | 448                  | 2.15                                   | 58     | 0.56    |                 |
|          | 3   | 435                  | 1.93                                   | 60     | 0.50    |                 |          | 3   | 447                  | 2.16                                   | 58     | 0.56    |                 |
| 7        | 1*  | 388                  | 2.10                                   | 58     | 0.48    | 1               | 6        | 1   | 437                  | 1.65                                   | 55     | 0.40    | 0               |
|          | 2*  | 404                  | 2.18                                   | 59     | 0.52    |                 |          | 2   | 438                  | 1.68                                   | 57     | 0.42    |                 |
|          | 3*  | 412                  | 2.22                                   | 59     | 0.54    |                 |          | 3   | 436                  | 1.70                                   | 58     | 0.43    |                 |
| 8        | 1   | 455                  | 2.60                                   | 62     | 0.74    | 1               | 7        | 1*  | 362                  | 1.40                                   | 55     | 0.28    | 1               |
|          | 2   | 451                  | 2.60                                   | 62     | 0.73    |                 |          | 2*  | 380                  | 1.49                                   | 58     | 0.33    |                 |
|          | 3   | 447                  | 2.59                                   | 62     | 0.72    |                 |          | 3*  | 389                  | 1.55                                   | 59     | 0.35    |                 |
| 13       | 1*  | 382                  | 1.77                                   | 59     | 0.40    | 6               | 8        | 1   | 447                  | 1.72                                   | 60     | 0.46    | 1               |
|          | 2*  | 391                  | 1.79                                   | 59     | 0.41    |                 |          | 2   | 446                  | 1.73                                   | 61     | 0.47    |                 |
|          | 3*  | 397                  | 1.81                                   | 59     | 0.42    |                 |          | 3   | 443                  | 1.72                                   | 61     | 0.47    |                 |
| 14       | 1   | 450                  | 1.93                                   | 62     | 0.54    | 6               | 13       | 1*  | 400                  | 1.81                                   | 57     | 0.41    | 6               |
|          | 2   | 445                  | 1.91                                   | 61     | 0.52    |                 |          | 2*  | 416                  | 1.89                                   | 59     | 0.46    |                 |
|          | 3   | 441                  | 1.90                                   | 61     | 0.51    |                 |          | 3*  | 424                  | 1.93                                   | 60     | 0.49    |                 |
| 20       | 1*  | 381                  | 1.49                                   | 58     | 0.33    | 12              | 14       | 1   | 494                  | 2.18                                   | 62     | 0.67    | 6               |
|          | 2*  | 389                  | 1.49                                   | 58     | 0.34    |                 |          | 2   | 490                  | 2.15                                   | 62     | 0.66    |                 |
|          | 3*  | 394                  | 1.50                                   | 58     | 0.34    |                 |          | 3   | 486                  | 2.14                                   | 62     | 0.64    |                 |
| 21       | 1   | 372                  | 0.38                                   | 59     | 0.08    | 12              | 20       | 1*  | 396                  | 1.59                                   | 57     | 0.36    | 12              |
|          | 2   | 368                  | 0.37                                   | 59     | 0.08    |                 |          | 2*  | 415                  | 1.65                                   | 58     | 0.40    |                 |
|          | 3   | 364                  | 0.37                                   | 59     | 0.08    |                 |          | 3*  | 424                  | 1.69                                   | 59     | 0.42    |                 |

|           |          |     |      |    |      |           |           |           |      |      |      |      |           |
|-----------|----------|-----|------|----|------|-----------|-----------|-----------|------|------|------|------|-----------|
| <b>29</b> | <b>1</b> | 434 | 1.40 | 56 | 0.34 | <b>20</b> | <b>21</b> | <b>1</b>  | 494  | 1.94 | 61   | 0.58 | <b>12</b> |
|           | <b>2</b> | 430 | 1.36 | 55 | 0.32 |           |           | <b>2</b>  | 490  | 1.92 | 61   | 0.57 |           |
|           | <b>3</b> | 428 | 1.35 | 55 | 0.32 |           |           | <b>3</b>  | 485  | 1.90 | 61   | 0.56 |           |
|           |          |     |      |    |      |           | <b>28</b> | <b>1*</b> | 415  | 1.55 | 57   | 0.36 | <b>19</b> |
|           |          |     |      |    |      |           | <b>2*</b> | 432       | 1.60 | 58   | 0.40 |      |           |
|           |          |     |      |    |      |           | <b>3*</b> | 437       | 1.62 | 58   | 0.41 |      |           |
|           |          |     |      |    |      |           | <b>29</b> | <b>1</b>  | 488  | 1.77 | 59   | 0.51 | <b>19</b> |
|           |          |     |      |    |      |           | <b>2</b>  | 487       | 1.75 | 59   | 0.50 |      |           |
|           |          |     |      |    |      |           | <b>3</b>  | 483       | 1.73 | 59   | 0.49 |      |           |
|           |          |     |      |    |      |           | <b>36</b> | <b>1</b>  | 490  | 1.76 | 59   | 0.50 | <b>19</b> |
|           |          |     |      |    |      |           | <b>2</b>  | 488       | 1.74 | 58   | 0.49 |      |           |
|           |          |     |      |    |      |           | <b>3</b>  | 484       | 1.73 | 58   | 0.49 |      |           |

\* measured at ~60 °C

**Table S10 – Evolution of photovoltaic parameters of aqueous DSSCs sensitized with D131:CDCA = 1:1.18 and filled with KI 5.50 M, I<sub>2</sub> 50 mM and CMC 6.5 wt% (cell K65B) stored at RT under dark conditions.**

| <b>K65B</b>     |            |                            |                                            |               |                |
|-----------------|------------|----------------------------|--------------------------------------------|---------------|----------------|
| <b>Time (d)</b> | <b>Run</b> | <b>V<sub>oc</sub> (mV)</b> | <b>J<sub>sc</sub> (mA cm<sup>-2</sup>)</b> | <b>FF (%)</b> | <b>PCE (%)</b> |
| <b>0</b>        | <b>1</b>   | 461                        | 2.08                                       | 57            | 0.55           |
|                 | <b>2</b>   | 452                        | 2.09                                       | 56            | 0.53           |
|                 | <b>3</b>   | 447                        | 2.09                                       | 56            | 0.53           |
| <b>1</b>        | <b>1</b>   | 470                        | 2.17                                       | 60            | 0.61           |
|                 | <b>2</b>   | 464                        | 2.16                                       | 60            | 0.60           |
|                 | <b>3</b>   | 459                        | 2.16                                       | 60            | 0.59           |
| <b>6</b>        | <b>1</b>   | 464                        | 2.02                                       | 60            | 0.56           |
|                 | <b>2</b>   | 462                        | 2.04                                       | 60            | 0.57           |
|                 | <b>3</b>   | 459                        | 2.04                                       | 60            | 0.57           |
| <b>13</b>       | <b>1</b>   | 469                        | 1.93                                       | 60            | 0.55           |
|                 | <b>2</b>   | 466                        | 1.94                                       | 61            | 0.55           |
|                 | <b>3</b>   | 462                        | 1.95                                       | 61            | 0.55           |
| <b>20</b>       | <b>1</b>   | 467                        | 1.86                                       | 60            | 0.52           |
|                 | <b>2</b>   | 463                        | 1.87                                       | 61            | 0.52           |
|                 | <b>3</b>   | 459                        | 1.87                                       | 60            | 0.52           |
| <b>28</b>       | <b>1</b>   | 466                        | 1.80                                       | 60            | 0.50           |
|                 | <b>2</b>   | 464                        | 1.82                                       | 61            | 0.51           |
|                 | <b>3</b>   | 461                        | 1.82                                       | 61            | 0.51           |
| <b>36</b>       | <b>1</b>   | 471                        | 1.76                                       | 60            | 0.50           |
|                 | <b>2</b>   | 466                        | 1.77                                       | 61            | 0.50           |
|                 | <b>3</b>   | 462                        | 1.77                                       | 61            | 0.50           |

**Table S11 – Evolution of photovoltaic parameters of aqueous DSSCs sensitized with D131:CDCA = 1:1.18 and filled with KI 5.50 M, I<sub>2</sub> 50 mM and CMC 6.5 wt% (cell K65A) stored at 60 °C under dark condition after 6 days of storage at ambient temperature.**

| <b>K65A</b>     |            |                            |                                            |               |                |                        |
|-----------------|------------|----------------------------|--------------------------------------------|---------------|----------------|------------------------|
| <b>Time (d)</b> | <b>Run</b> | <b>V<sub>oc</sub> (mV)</b> | <b>J<sub>sc</sub> (mA cm<sup>-2</sup>)</b> | <b>FF (%)</b> | <b>PCE (%)</b> | <b>Time @60 °C (d)</b> |
| <b>0</b>        | <b>1</b>   | 470                        | 2.13                                       | 60            | 0.60           | <b>0</b>               |
|                 | <b>2</b>   | 457                        | 2.11                                       | 59            | 0.57           |                        |
|                 | <b>3</b>   | 451                        | 2.11                                       | 59            | 0.56           |                        |
| <b>1</b>        | <b>1</b>   | 475                        | 2.34                                       | 61            | 0.67           | <b>0</b>               |
|                 | <b>2</b>   | 470                        | 2.33                                       | 61            | 0.67           |                        |
|                 | <b>3</b>   | 467                        | 2.33                                       | 61            | 0.66           |                        |
| <b>6</b>        | <b>1</b>   | 475                        | 2.16                                       | 61            | 0.63           | <b>0</b>               |
|                 | <b>2</b>   | 472                        | 2.16                                       | 61            | 0.63           |                        |
|                 | <b>3</b>   | 469                        | 2.17                                       | 61            | 0.62           |                        |
| <b>7</b>        | <b>1*</b>  | 401                        | 1.83                                       | 59            | 0.43           | <b>1</b>               |
|                 | <b>2*</b>  | 414                        | 1.90                                       | 61            | 0.48           |                        |
|                 | <b>3*</b>  | 421                        | 1.95                                       | 61            | 0.50           |                        |
| <b>8</b>        | <b>1</b>   | 413                        | 1.85                                       | 59            | 0.45           | <b>1</b>               |
|                 | <b>2</b>   | 426                        | 1.90                                       | 60            | 0.48           |                        |
|                 | <b>3</b>   | 434                        | 1.94                                       | 61            | 0.51           |                        |
| <b>13</b>       | <b>1*</b>  | 481                        | 2.14                                       | 63            | 0.65           | <b>6</b>               |
|                 | <b>2*</b>  | 478                        | 2.14                                       | 64            | 0.65           |                        |
|                 | <b>3*</b>  | 474                        | 2.13                                       | 63            | 0.64           |                        |
| <b>14</b>       | <b>1</b>   | 505                        | 2.18                                       | 64            | 0.70           | <b>6</b>               |
|                 | <b>2</b>   | 498                        | 2.16                                       | 64            | 0.69           |                        |
|                 | <b>3</b>   | 495                        | 2.15                                       | 64            | 0.68           |                        |
| <b>20</b>       | <b>1*</b>  | 429                        | 1.68                                       | 60            | 0.43           | <b>12</b>              |
|                 | <b>2*</b>  | 440                        | 1.71                                       | 60            | 0.45           |                        |
|                 | <b>3*</b>  | 444                        | 1.73                                       | 60            | 0.46           |                        |
| <b>21</b>       | <b>1</b>   | 499                        | 1.94                                       | 63            | 0.61           | <b>12</b>              |
|                 | <b>2</b>   | 495                        | 1.91                                       | 62            | 0.59           |                        |
|                 | <b>3</b>   | 488                        | 1.90                                       | 62            | 0.58           |                        |
| <b>28</b>       | <b>1*</b>  | 420                        | 1.56                                       | 59            | 0.39           | <b>19</b>              |
|                 | <b>2*</b>  | 420                        | 1.56                                       | 59            | 0.39           |                        |
|                 | <b>3*</b>  | 439                        | 1.61                                       | 60            | 0.42           |                        |
| <b>29</b>       | <b>1</b>   | 487                        | 1.76                                       | 61            | 0.53           | <b>19</b>              |
|                 | <b>2</b>   | 484                        | 1.73                                       | 61            | 0.51           |                        |
|                 | <b>3</b>   | 481                        | 1.72                                       | 61            | 0.50           |                        |
| <b>36</b>       | <b>1</b>   | 495                        | 1.74                                       | 62            | 0.53           | <b>19</b>              |
|                 | <b>2</b>   | 491                        | 1.71                                       | 61            | 0.51           |                        |
|                 | <b>3</b>   | 486                        | 1.69                                       | 61            | 0.50           |                        |

\* measured at ~60 °C

**Table S12 – Evolution of photovoltaic parameters of aqueous DSSCs sensitized with D131:CDCA = 1:1.18 and filled with NaI 4.50 M, I<sub>2</sub> 50 mM and CMC 7.5 wt% (cell Na75A) or KI 5.50 M, I<sub>2</sub> 50 mM and CMC 7.5 wt% (cell K75B) stored at ambient temperature under dark condition.**

| Na75A    |     |               |                                 |        |         | K75B     |     |               |                                 |        |         |
|----------|-----|---------------|---------------------------------|--------|---------|----------|-----|---------------|---------------------------------|--------|---------|
| Time (d) | Run | $V_{oc}$ (mV) | $J_{sc}$ (mA cm <sup>-2</sup> ) | FF (%) | PCE (%) | Time (d) | Run | $V_{oc}$ (mV) | $J_{sc}$ (mA cm <sup>-2</sup> ) | FF (%) | PCE (%) |
| 0        | 1   | 420           | 1.52                            | 53     | 0.34    | 0        | 1   | 456           | 2.13                            | 61     | 0.59    |
|          | 2   | 420           | 1.54                            | 53     | 0.34    |          | 2   | 452           | 2.14                            | 61     | 0.59    |
|          | 3   | 419           | 1.55                            | 54     | 0.35    |          | 3   | 448           | 2.15                            | 61     | 0.59    |
| 6        | 1   | 437           | 1.73                            | 59     | 0.44    | 1        | 1   | 459           | 1.88                            | 61     | 0.53    |
|          | 2   | 438           | 1.75                            | 59     | 0.45    |          | 2   | 455           | 1.89                            | 61     | 0.53    |
|          | 3   | 433           | 1.76                            | 59     | 0.45    |          | 3   | 451           | 1.89                            | 61     | 0.52    |
| 13       | 1   | 439           | 2.07                            | 60     | 0.55    | 6        | 1   | 437           | 1.51                            | 59     | 0.39    |
|          | 2   | 437           | 2.10                            | 61     | 0.56    |          | 2   | 437           | 1.54                            | 60     | 0.41    |
|          | 3   | 434           | 2.12                            | 61     | 0.56    |          | 3   | 435           | 1.55                            | 61     | 0.41    |
| 20       | 1   | 422           | 1.54                            | 59     | 0.39    | 13       | 1   | 440           | 1.42                            | 59     | 0.37    |
|          | 2   | 418           | 1.54                            | 60     | 0.39    |          | 2   | 439           | 1.45                            | 60     | 0.38    |
|          | 3   | 416           | 1.57                            | 59     | 0.39    |          | 3   | 436           | 1.46                            | 61     | 0.39    |
| 29       | 1   | 426           | 1.55                            | 59     | 0.39    | 20       | 1   | 438           | 1.36                            | 59     | 0.35    |
|          | 2   | 421           | 1.57                            | 60     | 0.40    |          | 2   | 436           | 1.40                            | 60     | 0.37    |
|          | 3   | 417           | 1.58                            | 60     | 0.39    |          | 3   | 432           | 1.40                            | 61     | 0.37    |
|          |     |               |                                 |        |         | 28       | 1   | 437           | 1.30                            | 59     | 0.34    |
|          |     |               |                                 |        |         |          | 2   | 436           | 1.32                            | 60     | 0.35    |
|          |     |               |                                 |        |         |          | 3   | 435           | 1.33                            | 61     | 0.35    |
|          |     |               |                                 |        |         | 36       | 1   | 438           | 1.25                            | 59     | 0.33    |
|          |     |               |                                 |        |         |          | 2   | 437           | 1.28                            | 60     | 0.34    |
|          |     |               |                                 |        |         |          | 3   | 434           | 1.30                            | 60     | 0.34    |

**Table S13 – Evolution of photovoltaic parameters of aqueous DSSCs sensitized with D131:CDCA = 1:1.18 and filled with NaI 4.50 M, I<sub>2</sub> 50 mM and CMC 7.5 wt% (cell Na75B) or KI 5.50 M, I<sub>2</sub> 50 mM and CMC 7.5 wt% (cell K75A) stored at 60 °C under dark condition after 6 days of storage at ambient temperature.**

| Na75B    |     |                      |                                        |        |         |                 | K75A     |     |                      |                                        |        |         |                 |
|----------|-----|----------------------|----------------------------------------|--------|---------|-----------------|----------|-----|----------------------|----------------------------------------|--------|---------|-----------------|
| Time (d) | Run | V <sub>oc</sub> (mV) | J <sub>sc</sub> (mA cm <sup>-2</sup> ) | FF (%) | PCE (%) | Time @60 °C (d) | Time (d) | Run | V <sub>oc</sub> (mV) | J <sub>sc</sub> (mA cm <sup>-2</sup> ) | FF (%) | PCE (%) | Time @60 °C (d) |
| 0        | 1   | 381                  | 0.58                                   | 52     | 0.11    | 0               | 0        | 1   | 443                  | 2.090                                  | 56     | 0.52    | 0               |
|          | 2   | 376                  | 0.60                                   | 52     | 0.12    |                 |          | 2   | 418                  | 0.885                                  | 57     | 0.21    |                 |
|          | 3   | 376                  | 0.62                                   | 51     | 0.12    |                 |          | 3   | 414                  | 0.889                                  | 57     | 0.21    |                 |
| 6        | 1   | 430                  | 1.52                                   | 59     | 0.38    | 0               | 6        | 1   | 421                  | 0.647                                  | 60     | 0.16    | 0               |
|          | 2   | 429                  | 1.54                                   | 58     | 0.39    |                 |          | 2   | 420                  | 0.655                                  | 60     | 0.17    |                 |
|          | 3   | 427                  | 1.55                                   | 58     | 0.39    |                 |          | 3   | 417                  | 0.661                                  | 60     | 0.17    |                 |
| 7        | 1*  | 388                  | 2.10                                   | 58     | 0.48    | 1               | 7        | 1*  | 389                  | 1.28                                   | 57     | 0.29    | 1               |
|          | 2*  | 404                  | 2.18                                   | 59     | 0.52    |                 |          | 2*  | 401                  | 1.34                                   | 59     | 0.32    |                 |
|          | 3*  | 412                  | 2.22                                   | 59     | 0.54    |                 |          | 3*  | 409                  | 1.38                                   | 59     | 0.34    |                 |
| 8        | 1   | 470                  | 2.44                                   | 62     | 0.71    | 1               | 8        | 1   | 392                  | 1.18                                   | 59     | 0.27    | 1               |
|          | 2   | 467                  | 2.44                                   | 62     | 0.71    |                 |          | 2   | 403                  | 1.22                                   | 60     | 0.29    |                 |
|          | 3   | 463                  | 2.44                                   | 62     | 0.70    |                 |          | 3   | 409                  | 1.24                                   | 60     | 0.31    |                 |
| 13       | 1*  | 418                  | 2.03                                   | 59     | 0.50    | 6               | 13       | 1*  | 473                  | 1.56                                   | 63     | 0.46    | 6               |
|          | 2*  | 426                  | 2.06                                   | 59     | 0.52    |                 |          | 2*  | 469                  | 1.56                                   | 63     | 0.46    |                 |
|          | 3*  | 429                  | 2.08                                   | 59     | 0.53    |                 |          | 3*  | 465                  | 1.56                                   | 62     | 0.45    |                 |
| 14       | 1   | 475                  | 2.22                                   | 61     | 0.64    | 6               | 14       | 1   | 477                  | 1.42                                   | 63     | 0.42    | 6               |
|          | 2   | 472                  | 2.21                                   | 61     | 0.63    |                 |          | 2   | 473                  | 1.40                                   | 63     | 0.41    |                 |
|          | 3   | 469                  | 2.20                                   | 60     | 0.62    |                 |          | 3   | 469                  | 1.38                                   | 63     | 0.40    |                 |
| 20       | 1*  | 400                  | 1.74                                   | 56     | 0.39    | 12              | 20       | 1*  | 390                  | 1.04                                   | 58     | 0.24    | 12              |
|          | 2*  | 408                  | 1.76                                   | 57     | 0.41    |                 |          | 2*  | 403                  | 1.07                                   | 59     | 0.25    |                 |
|          | 3*  | 413                  | 1.78                                   | 57     | 0.42    |                 |          | 3*  | 410                  | 1.08                                   | 59     | 0.26    |                 |
| 21       | 1   | 461                  | 1.91                                   | 57     | 0.50    | 12              | 21       | 1   | 466                  | 1.21                                   | 61     | 0.35    | 12              |
|          | 2   | 459                  | 1.89                                   | 57     | 0.50    |                 |          | 2   | 461                  | 1.16                                   | 61     | 0.33    |                 |
|          | 3   | 456                  | 1.88                                   | 57     | 0.49    |                 |          | 3   | 456                  | 1.15                                   | 61     | 0.32    |                 |



|           |          |     |      |    |      |           |           |           |      |      |      |      |           |
|-----------|----------|-----|------|----|------|-----------|-----------|-----------|------|------|------|------|-----------|
| <b>29</b> | <b>1</b> | 448 | 1.66 | 49 | 0.37 | <b>19</b> | <b>28</b> | <b>1*</b> | 403  | 0.93 | 57   | 0.21 | <b>19</b> |
|           | <b>2</b> | 445 | 1.65 | 50 | 0.37 |           |           | <b>2*</b> | 410  | 0.93 | 58   | 0.22 |           |
|           | <b>3</b> | 443 | 1.64 | 51 | 0.37 |           |           | <b>3*</b> | 415  | 0.93 | 58   | 0.23 |           |
|           |          |     |      |    |      |           | <b>29</b> | <b>1</b>  | 458  | 1.05 | 59   | 0.28 | <b>19</b> |
|           |          |     |      |    |      | <b>2</b>  |           | 453       | 1.02 | 59   | 0.27 |      |           |
|           |          |     |      |    |      | <b>3</b>  |           | 449       | 1.00 | 59   | 0.26 |      |           |
|           |          |     |      |    |      |           | <b>36</b> | <b>1</b>  | 458  | 1.04 | 59   | 0.28 | <b>19</b> |
|           |          |     |      |    |      | <b>2</b>  |           | 453       | 1.02 | 59   | 0.27 |      |           |
|           |          |     |      |    |      | <b>3</b>  |           | 449       | 0.99 | 59   | 0.26 |      |           |

\* measured at ~60 °C

**Table S14 – List of the weak aspects of 100% aqueous electrolytes present in the literature with respect to the hydrogel proposed in this work.**

| Components                                                                                                                                                                   | $J_{sc}$<br>(mA cm <sup>-2</sup> ) | $V_{oc}$<br>(V) | FF   | PCE<br>(%) | PCE loss<br>(%)        | Ref. | Weak points with respect to this work                                                                                              |
|------------------------------------------------------------------------------------------------------------------------------------------------------------------------------|------------------------------------|-----------------|------|------------|------------------------|------|------------------------------------------------------------------------------------------------------------------------------------|
| NaI 0.10 M and I <sub>2</sub> 10 mM                                                                                                                                          | 1.92                               | 0.498           | 0.55 | 0.529      | -                      | [1]  | Not stable. Less efficient.                                                                                                        |
| LiI 0.10 M, I <sub>2</sub> 10 mM, 0.5 wt% κ-carrageenan and HNO <sub>3</sub> (pH 2)                                                                                          | 2.69                               | 0.442           | 0.48 | 0.586      | -                      | [2]  | Not stable. Less efficient. Strongly acidic.                                                                                       |
| KI 0.50 M and I <sub>2</sub> 25 mM                                                                                                                                           | 2.14                               | 0.44            | 0.64 | 0.6        | -                      | [3]  | Not stable. Less efficient.                                                                                                        |
| KI 0.50 M and I <sub>2</sub> 25 mM                                                                                                                                           | 3.61                               | 0.47            | 0.65 | 1.1        | 50% (75 d, dark, RT)   | [3]  | Not stable.                                                                                                                        |
| PMII 2.0 M, I <sub>2</sub> 50 mM, GuSCN 0.10 M, TBP 0.50 M and Triton X-100 1%                                                                                               | 2.28                               | 0.66            | 0.79 | 1.16       | -                      | [4]  | Not stable. It contains petroleum-derived and toxic additives. Based on our experience, TBP is not soluble in H <sub>2</sub> O [5] |
| KI 4.0 M, I <sub>2</sub> 20 mM, HNO <sub>3</sub> (pH 4) and BMPP (saturated)                                                                                                 | 3.97                               | 0.481           | 0.68 | 1.34       | -                      | [6]  | Not stable.                                                                                                                        |
| [Co(bpy) <sub>3</sub> ]Cl <sub>2</sub> 0.13 M, [Co(bpy) <sub>3</sub> ]Cl <sub>3</sub> 40 mM, NMBI 0.80 M                                                                     | 3.4                                | 0.63            | 0.68 | 1.4        | 25% (200 h, 1 sun, RT) | [7]  | Less stable. It contains heavy metals and petroleum-derived/toxic additives.                                                       |
| Acrylic acid : Gelatin : (NH <sub>4</sub> ) <sub>2</sub> S <sub>2</sub> O <sub>8</sub> = 10:1:0.08 polymerized at 80 °C, then swollen in LiI 0.50 M and I <sub>2</sub> 50 mM | 4.3                                | 0.59            | 0.71 | 1.80       | 20% (2 h, dark)        | [8]  | Less stable. It requires a thermal treatment.                                                                                      |
| NaI 2.0 M, I <sub>2</sub> 20 mM, GuSCN 0.50 M and CDCA until saturation                                                                                                      | 4.91                               | 0.62            | 0.64 | 1.88       | -                      | [9]  | Not stable.                                                                                                                        |
| TEMPOL 1.0 M and NaBF <sub>4</sub> 1.0 M                                                                                                                                     | 4.5                                | 0.69            | 0.64 | 2.1        | -                      | [10] | Not stable.                                                                                                                        |
| PMII 2.0 M, I <sub>2</sub> 50 mM, GuSCN 0.10 M, TBP 0.50 M                                                                                                                   | 3.78                               | 0.68            | 0.82 | 2.1        | -                      | [4]  | Not stable. It contains petroleum-derived and toxic additives. Based on our                                                        |

|                                                                                                            |       |       |      |      |                                  |      |                                                                                                                                     |
|------------------------------------------------------------------------------------------------------------|-------|-------|------|------|----------------------------------|------|-------------------------------------------------------------------------------------------------------------------------------------|
| and Triton X-100 1%                                                                                        |       |       |      |      |                                  |      | experience, TBP is not soluble in H <sub>2</sub> O [5].                                                                             |
| KI 4.0 M, I <sub>2</sub> 20 mM and CDCA until saturation                                                   | 4.86  | 0.600 | 0.76 | 2.20 | -                                | [11] | Not stable.                                                                                                                         |
| PMII 2.0 M, I <sub>2</sub> 50 mM, GuSCN 0.10 M, TBP 0.50 M and Triton X-100 1%                             | 4.7   | 0.74  | 0.69 | 2.4  | -                                | [12] | Not stable. It contains petroleum-derived and toxic additives. Based on our experience, TBP is not soluble in H <sub>2</sub> O [5]. |
| TT-EMI <sup>+</sup> 0.20 M, DTT 0.20 M, TBP 0.50 M and 1% Triton X-100                                     | 7.2   | 0.65  | 0.55 | 2.6  | 37% (4 h, 1 sun, RT)             | [13] | Not stable. It contains petroleum-derived and toxic additives. Based on our experience, TBP is not soluble in H <sub>2</sub> O [5]. |
| NaI 2.0 M, I <sub>2</sub> 20 mM, GuSCN 0.50 M and CDCA until saturation                                    | 7.34  | 0.59  | 0.63 | 2.64 | -                                | [9]  | Not stable.                                                                                                                         |
| KI 2.0 M, I <sub>2</sub> 10 mM and CDCA until saturation                                                   | 6.85  | 0.650 | 0.67 | 3.01 | -                                | [11] | Not stable.                                                                                                                         |
| NaI 2.0 M, I <sub>2</sub> 20 mM, GuSCN 1.0 M, HNO <sub>3</sub> (pH 3) and CDCA until saturation            | 8.5   | 0.59  | 0.63 | 3.08 | -                                | [9]  | Not stable. Strongly acidic.                                                                                                        |
| GuI 8.0 M, I <sub>2</sub> 20 mM, CDCA (sat.) and SiO <sub>2</sub> (5 wt%)                                  | 8.20  | 0.75  | 0.51 | 3.13 | 37% (1200 h, outdoor)            | [14] | Lower amount of renewable components. Lack of thermal stability test.                                                               |
| [Co(phen) <sub>3</sub> ]Cl <sub>2</sub> 0.13 M, [Co(phen) <sub>3</sub> ]Cl <sub>3</sub> 40 mM, NMBI 0.80 M | 6.3   | 0.75  | 0.73 | 3.4  | 45% (200 h, 1 sun, RT)           | [7]  | Less stable. It contains heavy metals and petroleum-derived/toxic additives.                                                        |
| TT-EMI <sup>+</sup> 0.20 M, DTT 0.60 M, TBP 0.50 M and 1% Triton X-100                                     | 9.5   | 0.61  | 0.59 | 3.5  | -                                | [13] | Not stable. It contains petroleum-derived and toxic additives.                                                                      |
| NaI 2.0 M, I <sub>2</sub> 0.20 M, GuSCN 0.10 M and FC-134 0.2 wt%                                          | 10.97 | 0.53  | 0.68 | 3.96 | 63% (50 d, 1 sun, RT, UV filter) | [15] | Less stable.                                                                                                                        |

|                                                                                                                                                   |       |       |      |      |                        |      |                                                                              |
|---------------------------------------------------------------------------------------------------------------------------------------------------|-------|-------|------|------|------------------------|------|------------------------------------------------------------------------------|
| GuI 8.0 M, I <sub>2</sub> 20 mM and CDCA until saturation                                                                                         | 10.02 | 0.61  | 0.67 | 4.06 | -                      | [9]  | Not stable.                                                                  |
| K <sub>4</sub> Fe(CN) <sub>6</sub> 0.40 M, K <sub>3</sub> Fe(CN) <sub>6</sub> 40 mM, KCl 0.10 M, Trizma-HCl buffer 50 mM (pH 8) and Tween 20 0.1% | 7.2   | 0.76  | 0.75 | 4.1  | 50% (2 h)              | [16] | Not stable.                                                                  |
| [Co(bpy) <sub>3</sub> ] <sup>2+</sup> 0.20 M, [Co(bpy) <sub>3</sub> ] <sup>3+</sup> 40 mM, NMBI 0.70 M, PEG 300 1% and Gelatin 15%                | 7.9   | 0.70  | 0.74 | 4.1  | 25% (120 d, dark)      | [17] | It contains heavy metals and petroleum-derived/toxic additives.              |
| [Co(bpy) <sub>3</sub> ] <sup>2+</sup> 0.20 M, [Co(bpy) <sub>3</sub> ] <sup>3+</sup> 40 mM, NMBI 0.70 M and PEG 300 1%                             | 8.3   | 0.68  | 0.72 | 4.2  | 10% (90 d, dark)       | [18] | It contains heavy metals and petroleum-derived/toxic additives.              |
| TEMPO 0.15 M, TEMPOBF <sub>4</sub> 50 mM, LiClO <sub>4</sub> 0.10 M and NMBI 0.20 M                                                               | 5.78  | 0.955 | 0.75 | 4.14 | -                      | [19] | Not stable.                                                                  |
| [Co(phen) <sub>3</sub> ]Cl <sub>2</sub> 0.13 M, [Co(phen) <sub>3</sub> ]Cl <sub>3</sub> 60 mM, NMBI 0.80 M                                        | 8.6   | 0.75  | 0.72 | 4.8  | 45% (200 h, 1 sun, RT) | [7]  | Less stable. It contains heavy metals and petroleum-derived/toxic additives. |
| TEMPO 0.40 M, NOBF <sub>4</sub> 0.40 M, LiI 0.10 M, I <sub>2</sub> 50 mM, DMPII 0.60 M, GuSCN 0.10 M and Tween 20 0.1%                            | 9.56  | 0.77  | 0.67 | 4.96 | -                      | [20] | Not stable.                                                                  |
| [Co(bpy) <sub>3</sub> ] <sup>2+</sup> 0.20 M, [Co(bpy) <sub>3</sub> ] <sup>3+</sup> 40 mM, NMBI 0.70 M NMBI and PEG 300 1%                        | 9.8   | 0.69  | 0.74 | 5    | Gain 2% (2 d, dark)    | [18] | Less stable. It contains heavy metals and petroleum-derived/toxic additives. |
| [Co(bpy-pz) <sub>3</sub> ]Cl <sub>2</sub> 0.13 M, [Co(bpy-pz) <sub>3</sub> ]Cl <sub>3</sub> 60 mM, NMBI 0.80 M                                    | 81    | 0.90  | 0.76 | 5.5  | -                      | [7]  | Not stable. It contains heavy metals and petroleum-derived/toxic additives.  |
| [Co(bpy) <sub>3</sub> ](NO <sub>3</sub> ) <sub>2</sub> 0.20 M, [Co(bpy) <sub>3</sub> ](NO <sub>3</sub> ) <sub>3</sub> 40 mM,                      | 10.17 | 0.821 | 0.68 | 5.64 | 0% (500 h, dark)       | [21] | It contains heavy metals and petroleum-derived/toxic additives.              |

|                                              |      |      |      |      |   |      |             |
|----------------------------------------------|------|------|------|------|---|------|-------------|
| NMBI 0.70 M and PEG 300 1<br>wt%             |      |      |      |      |   |      |             |
| JC-IL 0.40 M and NOBF <sub>4</sub> 0.40<br>M | 9.87 | 0.88 | 0.68 | 5.97 | - | [22] | Not stable. |

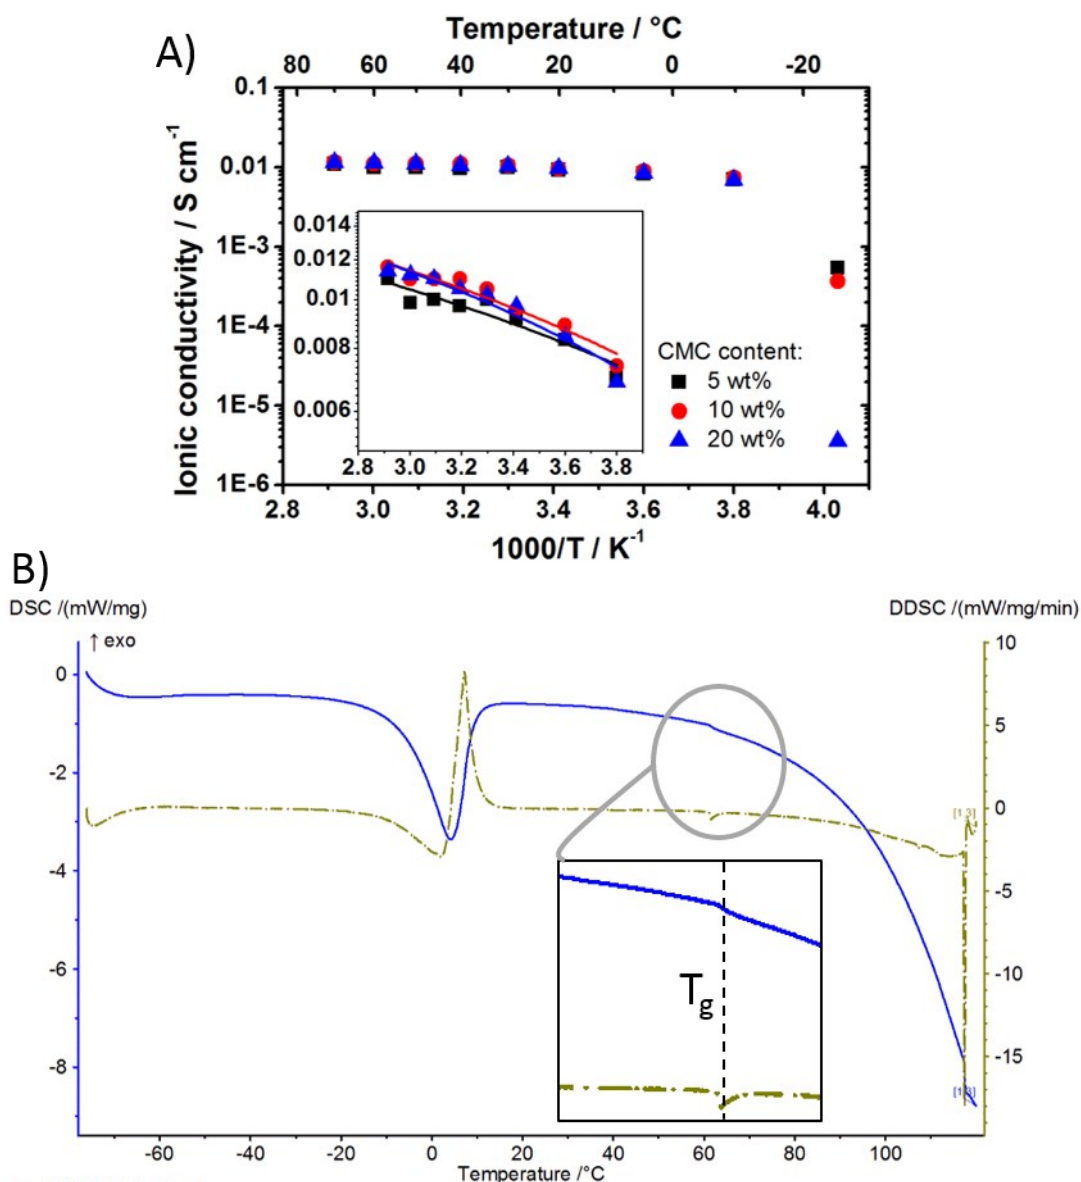

**Fig. S1. A)** Arrhenius plot showing the ionic conductivity data in the temperature range of  $-25/+70^{\circ}\text{C}$ , for aqueous NaI 0.50 M gels containing different amounts of CMC. The corresponding  $R^2$  values are 0.87 (5 wt%), 0.93 (10 wt%) and 0.95 (20 wt%).; **B)** Differential scanning calorimetry (DSC) trace of the 10 wt% CMC-containing electrolyte: a  $T_g$  value equal to  $+62^{\circ}\text{C}$  emerges. The  $T_g$  is above the standard operating temperature of DSSCs, therefore we collected almost all ionic conductivity data below the  $T_g$ . This means that the VTF behavior cannot be invoked, since it is related to semirandom motion of short polymer segments occurring when electrolytes work in a temperature exceeding the  $T_g$ . Thus, we likely attribute the ionic conductivity vs. temperature trend to a mixed Arrhenius / Non-Arrhenius behaviour.

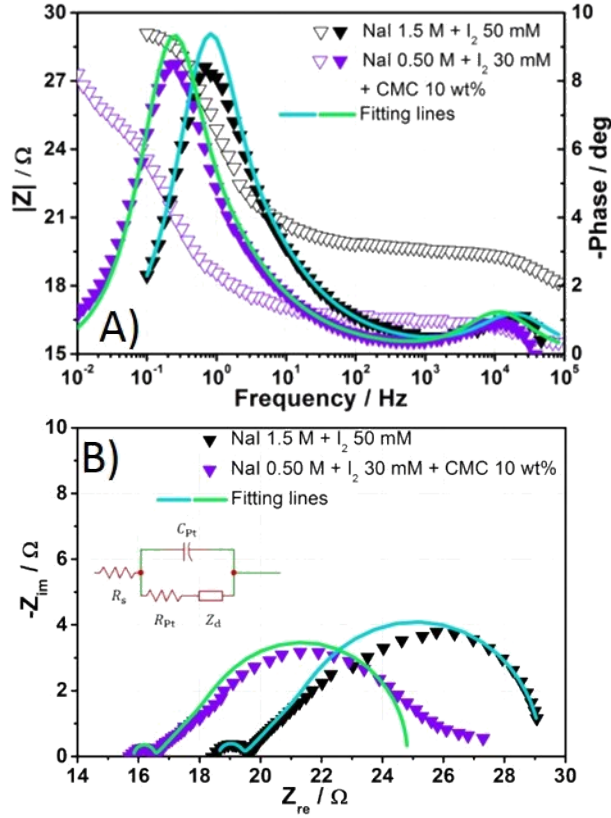

**Fig. S2. A)** Bode (modulus = open triangles; phase = filled triangles) and **B)** Nyquist plots of a dummy cell filled with aqueous NaI 0.50 M, I<sub>2</sub> 30 mM and CMC 10 wt%. The spectra of a dummy cell filled with aqueous NaI 1.5 M + I<sub>2</sub> 50 mM are shown for comparison. The spectra were fitted according to Eq. 2 and the equivalent circuit is shown in panel B. according to:

$$Z(\omega) = R_s + \frac{1}{\frac{1}{(R_{ct} + Z_d)} + T_{Pt}(i\omega)^{\varphi_{Pt}}} \quad (\text{Eq. S1})$$

where  $R_s$  is the series resistance,  $R_{ct}$  is the charge transfer resistance at the TiO<sub>2</sub>/electrolyte interface,  $Z_d$  is the impedance due to ionic diffusion,  $\omega$  is the frequency of the applied small-amplitude modulated potential,  $T_{Pt}$  and  $\varphi_{Pt}$  are the parameters of the constant phase element (CPE) used to describe the double layer capacitance at the Pt/electrolyte interface ( $C_{Pt}$ , accounting for the corresponding depressed semicircle in the Nyquist plot). The constraint  $0.90 \leq \varphi_{Pt} \leq 1$  was applied and the double layer capacitance was calculated from the CPE as follows [23]:

$$C_{Pt} = \varphi_{Pt} \sqrt{\frac{T_{Pt}}{R_{Pt}(\varphi_{Pt} - 1)}} \quad (\text{Eq. S2})$$

where  $R_{Pt}$  is the AC resistance to charge transfer at the Pt/electrolyte interface.





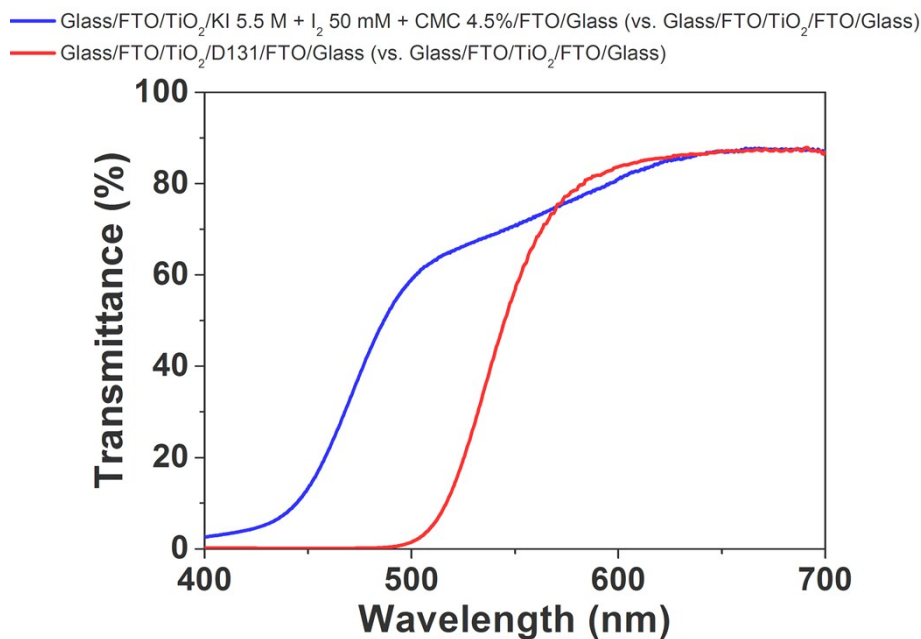

**Fig. S3.** Transmittance of: i) The hydrogel electrolyte proposed in this work (blue curve); ii) The metal-free sensitizer chosen for DSSCs (red curve). It emerges the typical absorption in the near-UV region due to the iodine-based redox couple, and the absorption at low wavelength typical of a yellow dye as D131. This allows to obtain solar cells with a high transmittance (>70%) above 550 nm, which accounts for their suitability in building-integrated applications.

---

## References

- [1] H. Zhang, Y. Wang, P. Liu, Y. Li, H. G. Yang, T. An, P. K. Wong, D. Wang, Z. Tang and H. Zhao, *Nano Energy*, 2015, **13**, 124-130.
- [2] M. Kaneko, T. Nomura and C. Sasaki, *Macromol. Rapid Commun.*, 2003, **24**, 444-446.
- [3] H. Saito, S. Uegusa, T. N. Murakami, N. Kawashima and T. Miyasaka, *Electrochemistry*, 2004, **72**, 310-316.
- [4] H. Choi, B. S. Jeong, K. Do, M. J. Ju, K. Song and J. Ko, *New J. Chem.*, 2013, **37**, 329-336.
- [5] F. Bella, S. Galliano, M. Falco, G. Viscardi, C. Barolo, M. Grätzel and C. Gerbaldi, *Chem. Sci.*, 2016, **7**, 4880-4890.
- [6] R. Cisneros, M. Beley, F. Lopicque and P. C. Gros, *Eur. J. Inorg. Chem.*, 2016, **2016**, 33-39.
- [7] H. Ellis, R. Jiang, S. Ye, A. Hagfeldt and G. Boschloo, *Phys. Chem. Chem. Phys.*, 2016, **18**, 8419-8427.
- [8] S. Zhang, G. Y. Dong, B. Lin, J. Qu, N. Y. Yuan, J. N. Ding and Z. Gu, *Sol. Energy*, 2016, **127**, 19-27.
- [9] C. Law, O. Moudam, S. Villarroja-Lidon and B. C. O'Regan, *J. Mater. Chem.*, 2012, **22**, 23387-23394.
- [10] R. Kato, F. Kato, K. Oyaizu and H. Nishide, *Chem. Lett.*, 2014, **43**, 480-482.
- [11] V. Leandri, H. Ellis, E. Gabrielsson, L. Sun, G. Boschloo and A. Hagfeldt, *Phys. Chem. Chem. Phys.*, 2014, **16**, 19964-19971.
- [12] C. H. Law, S. C. Pathirana, X. Li, A. Y. Anderson, P. R. F. Barnes, A. Listorti, T. H. Ghaddar and B. O'Regan, *Adv. Mater.*, 2010, **22**, 4505-4509.
- [13] H. Tian, E. Gabrielsson, P. W. Lohse, N. Vlachopoulos, L. Kloo, A. Hagfeldt and L. Sun, *Energy Environ. Sci.*, 2012, **5**, 9752-9755.
- [14] O. Moudam and A. El Gamouz, *Org. Electron.*, 2016, **36**, 7-11.
- [15] H. Zhang, L. Qiu, D. Xu, W. Zhang and F. Yan, *J. Mater. Chem. A*, 2014, **2**, 2221-2226.
- [16] T. Daeneke, Y. Uemura, N. W. Duffy, A. J. Mozer, N. Koumura, U. Bach and L. Spiccia, *Adv. Mater.*, 2012, **24**, 1222-1225.
- [17] W. Xiang, D. Chen, R. A. Caruso, Y. B. Cheng, U. Bach and L. Spiccia, *ChemSusChem*, 2015, **8**, 3704-3711.
- [18] W. Xiang, F. Huang, Y. B. Cheng, U. Bach and L. Spiccia, *Energy Environ. Sci.*, 2013,

---

6, 121-127.

[19] W. Yang, M. Söderberg, A. I. K. Eriksson and G. Boschloo, *RSC Adv.*, 2015, **5**, 26706-26709.

[20] R. Y. Y. Lin, T. M. Chuang, F. L. Wu, P. Y. Chen, T. C. Chu, J. S. Ni, M. S. Fan, Y. H. Lo, K. C. Ho and J. T. Lin, *ChemSusChem*, 2015, **8**, 105-113.

[21] C. Dong, W. Xiang, F. Huang, D. Fu, W. Huang, U. Bach, Y. B. Cheng, X. Li and L. Spiccia, *Angew. Chem. Int. Ed.*, 2014, **53**, 6933-6937.

[22] R. Y. Y. Lin, F. L. Wu, C. T. Li, P. Y. Chen, K. C. Ho and J. T. Lin, *ChemSusChem*, 2015, **8**, 2503-2513.

[23] J. Macdonald and E. Barsoukov, *Impedance spectroscopy: theory experiment and applications. 2<sup>nd</sup> edition*, Hoboken (New Jersey): John Wiley & Sons, Inc; 2005.
